# Supplementary material for: Nitrogen configuration enriched N-doped activated carbon from spent tea leaves through an ammonia impregnation approach for CO2 adsorption
Source: Royal Society of Chemistry journal article supplement (doi:10.1039/d4nj03301a), 2024-01-01
Supplement: d4nj03301a1.pdf [file d4nj03301a1.pdf]

## Supporting Information

### Nitrogen Configuration Enriched N-doped Activated Carbon from Spent Tea Leaves Through Ammonia Impregnation Approach for CO<sub>2</sub> Adsorption

Amirul Hafiiz Ruhaimi <sup>a</sup> and Muhammad Arif Ab. Aziz <sup>\*ab</sup>

<sup>a</sup> Faculty of Chemical and Energy Engineering, Universiti Teknologi Malaysia (UTM), 81310 UTM Johor Bahru, Johor, Malaysia.

<sup>b</sup> Centre of Hydrogen Energy, Institute of Future Energy, Universiti Teknologi Malaysia (UTM), 81310 UTM Johor Bahru, Johor, Malaysia.

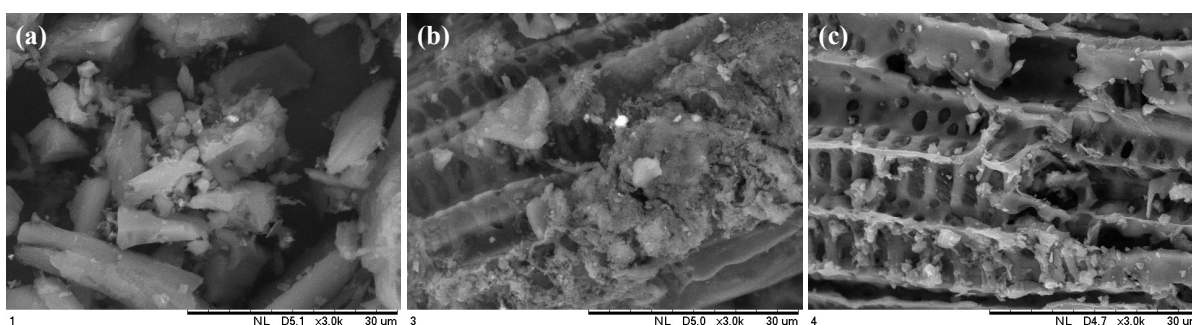

**Fig. S1** The SEM image of a) CAC and the stem-part of b) NC and c) NA773C

**Table S1** The CHNS Elemental Composition of The Prepared Adsorbent Using Elemental Analyser (VarioMICRO CHNS, ELEMENTAR).

| Adsorbent | Elemental Composition (wt%) |         |             |         |             |         |             |         |
|-----------|-----------------------------|---------|-------------|---------|-------------|---------|-------------|---------|
|           | N                           |         | C           |         | H           |         | S           |         |
|           | Composition                 | Average | Composition | Average | Composition | Average | Composition | Average |
| CAC       | 0.4167                      | 0.4     | 58.5985     | 58.6    | 2.7283      | 2.8     | 2.3303      | 2.3     |
|           | 0.3854                      |         | 58.9048     |         | 2.8900      |         | 2.2658      |         |
|           | 0.3846                      |         | 58.2323     |         | 2.8500      |         | 2.1685      |         |
| AC        | 2.2824                      | 2.2     | 57.4274     | 57.3    | 2.9105      | 2.9     | 2.1092      | 2.1     |
|           | 2.2193                      |         | 57.4846     |         | 2.9655      |         | 2.1182      |         |
|           | 2.1851                      |         | 56.9077     |         | 2.9539      |         | 2.0288      |         |
| NC        | 5.7384                      | 5.7     | 68.1188     | 68.3    | 3.3569      | 3.3     | 2.0193      | 2.0     |
|           | 5.6981                      |         | 68.1813     |         | 3.3203      |         | 2.0097      |         |
|           | 5.5548                      |         | 68.4532     |         | 3.3217      |         | 2.0224      |         |
| NA773C    | 3.7231                      | 3.7     | 57.7098     | 58.8    | 2.3095      | 2.4     | 2.0061      | 2.0     |
|           | 3.7484                      |         | 60.0293     |         | 2.3295      |         | 1.9891      |         |
|           | 3.6771                      |         | 58.5131     |         | 2.4262      |         | 2.0349      |         |

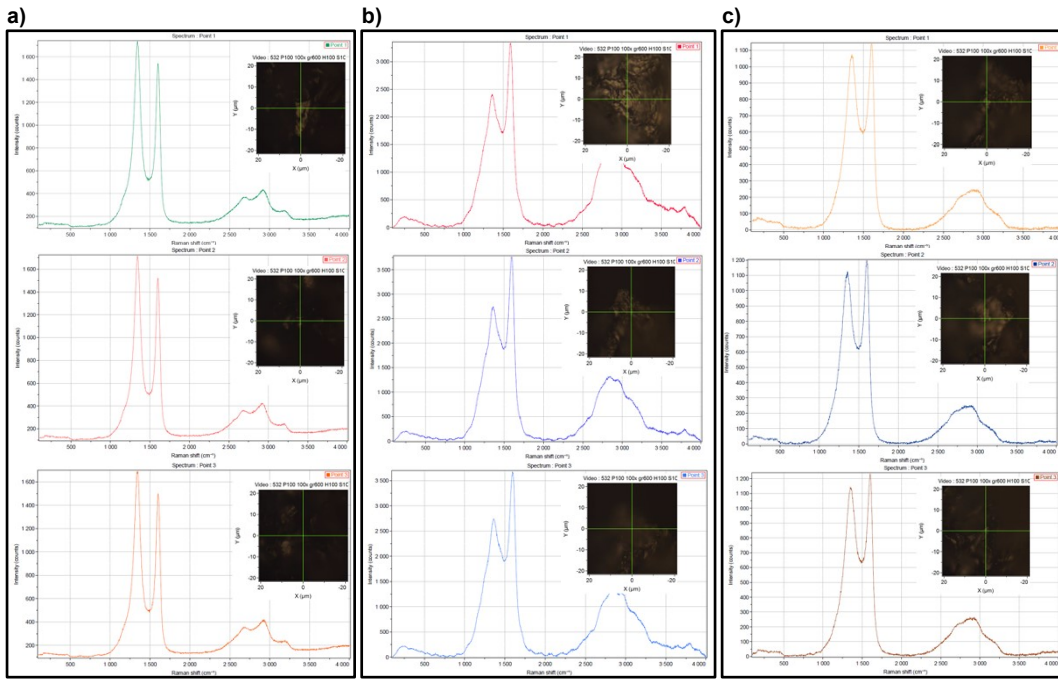

**Fig. S2** The RAMAN spectra of; a) CAC, b) NC and c) NA773C at three (3) different scanning point.

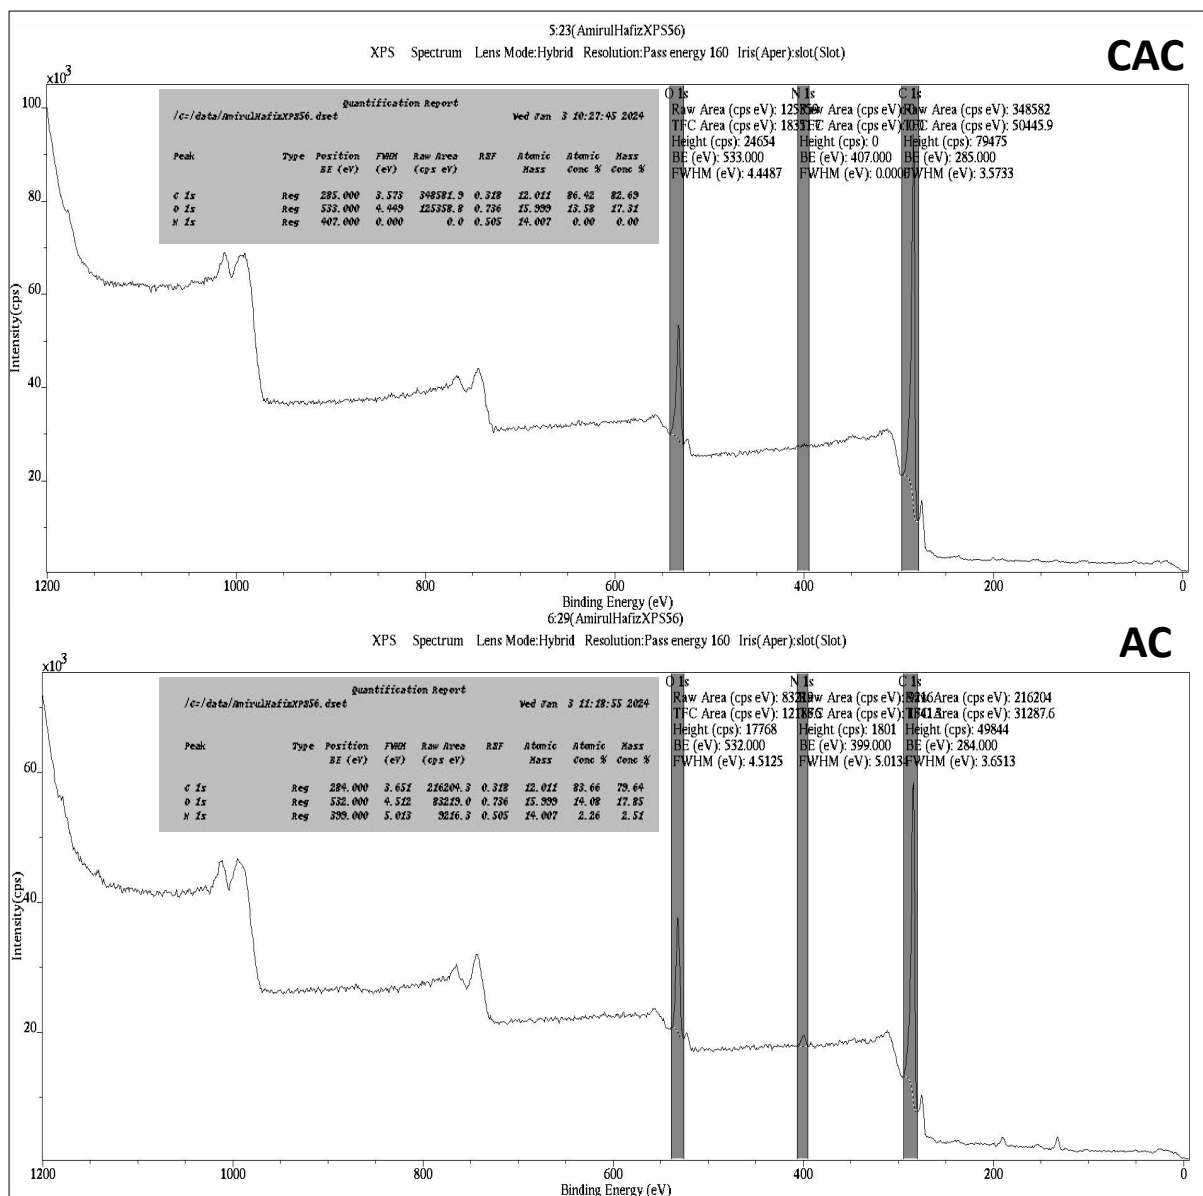

**Fig. S3** The full-scale XPS Spectrum of CAC and AC recorded on a Kratos Axis Ultra spectrometer.

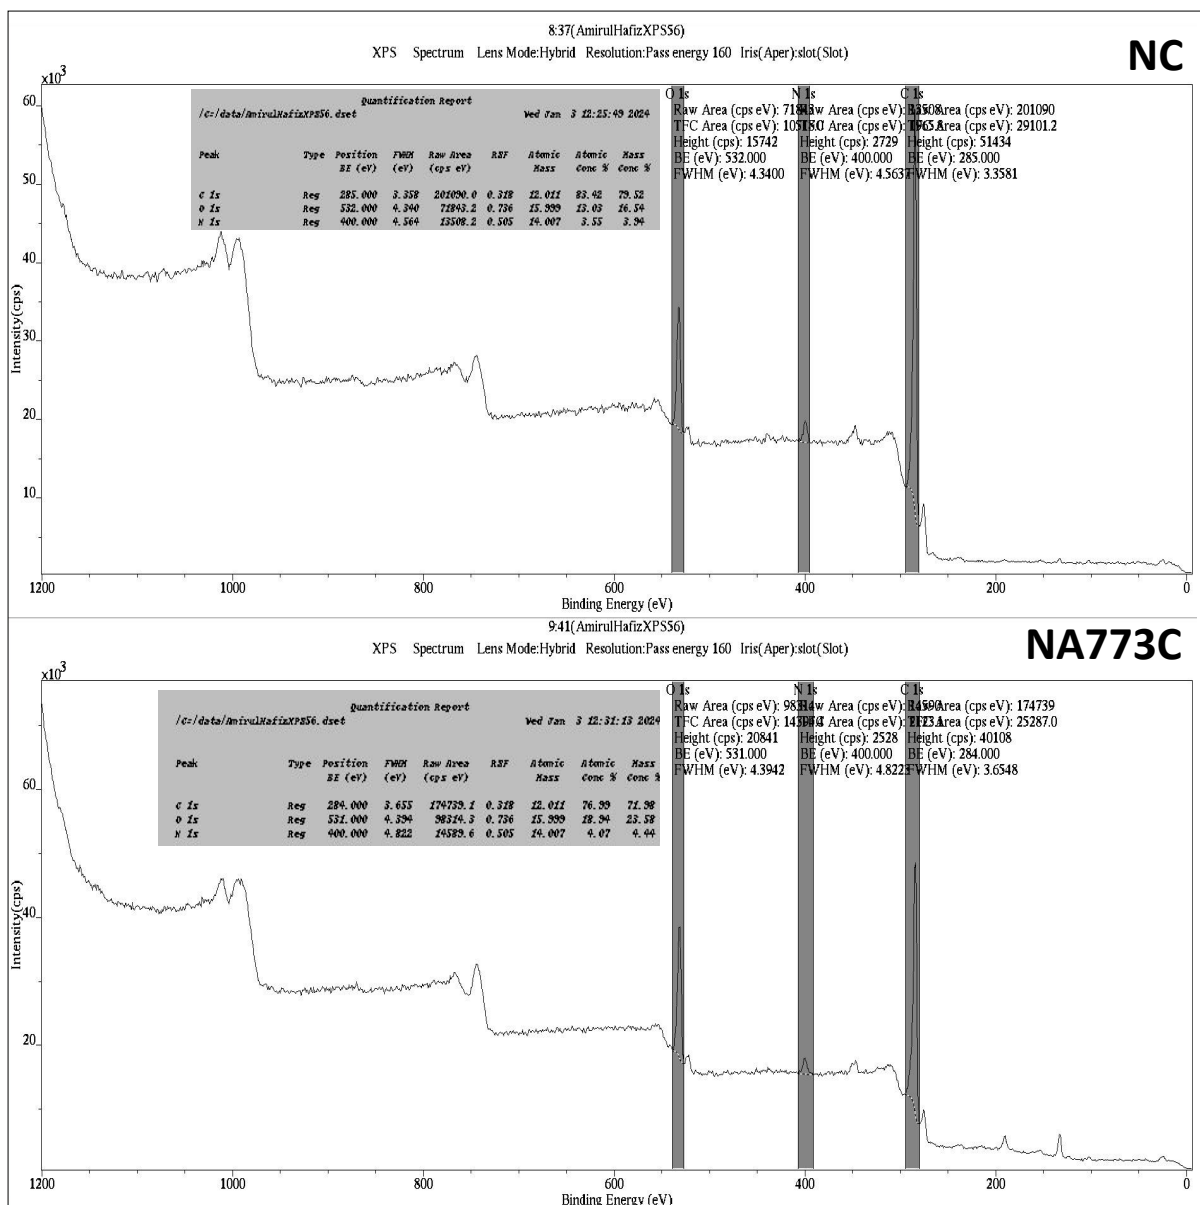

**Fig. S4** The full-scale XPS Spectrum of NC and NA773C recorded on a Kratos Axis Ultra spectrometer.
